# Supplementary material for: CTRP3 attenuates inflammation, oxidative and cell death in cisplatin induced HK-2 cells
Source: PeerJ. 2023 Aug 23;11:e15890. doi: 10.7717/peerj.15890 (PMC10460153; doi:10.7717/peerj.15890)
Supplement: Supplemental Information 2 — Used in preparation for Fig. 2C, D, E, Fig. 3C, D, E, Fig. 4C, D, Fig. 5C, D, and Fig. 9C, D, E. [file peerj-11-15890-s002.xlsx]

## Sheet: Sheet1
CAT activity
GROUP	detect OD	CAT（U/ml）	concentration（mgprot/ml）	CAT（U/mgprot）	control OD
control1	0.202	128.499	3.107	41.358	0.769
control2	0.211	126.467	3.113	40.6253	0.773
control3	0.215	125.563	3.215	39.0555	0.771
cisplatin1	0.575	44.2633	3.315	13.3524
cisplatin2	0.571	45.1667	3.225	14.0052
cisplatin3	0.568	45.8442	3.315	13.8293
cisplatin+vector1	0.574	44.4892	3.225	13.7951
cisplatin+vector2	0.573	44.715	3.335	13.4078
cisplatin+vector3	0.567	46.07	3.245	14.1972
cisplatin+CTRP3	0.375	89.43	3.207	27.8859
cisplatin+CTRP3	0.371	90.3333	3.133	28.8329
cisplatin+CTRP3	0.368	91.0108	3.235	28.1332
control1	0.212	126.241	3.207	39.3642
control2	0.221	124.208	3.213	38.6581
control3	0.205	127.822	3.115	41.0342
cisplatin1	0.565	46.5217	3.215	14.4702
cisplatin2	0.568	45.8442	3.325	13.7877
cisplatin3	0.578	43.5858	3.415	12.7631
cisplatin+si-NC1	0.564	46.7475	3.305	14.1445
cisplatin+si-NC2	0.575	44.2633	3.435	12.886
cisplatin+si-NC3	0.577	43.8117	3.345	13.0977
cisplatin+siCTRP3	0.654	26.4225	3.405	7.75991
cisplatin+siCTRP3	0.665	23.9383	3.235	7.39979
cisplatin+siCTRP3	0.647	28.0033	3.325	8.42206
control1	0.214	125.789	3.217	39.1014
control2	0.225	123.305	3.113	39.6097
control3	0.216	125.338	3.125	40.108
cisplatin1	0.575	44.2633	3.315	13.3524
cisplatin2	0.568	45.8442	3.425	13.3852
cisplatin3	0.585	42.005	3.406	12.3326
cisplatin+CTRP3	0.415	80.3967	3.205	25.0848
cisplatin+CTRP3	0.418	79.7192	3.235	24.6427
cisplatin+CTRP3	0.425	78.1383	3.445	22.6817
cisplatin+CTRP3+siNrf2	0.545	51.0383	3.237	15.7672
cisplatin+CTRP3+siNrf2	0.551	49.6833	3.251	15.2825
cisplatin+CTRP3+siNrf2	0.568	45.8442	3.246	14.1233
SOD1 mRNA level
sample	actin	gene Ct	△Ct	△△Ct	2-△△Ct
control1	17.58	27.68	10.1	-0.06	1.04247			10.16
control2	17.68	27.81	10.13	-0.03	1.02101
control3	17.71	27.96	10.25	0.09	0.939523
cisplatin1	18.45	31.28	12.83	2.67	0.157127
cisplatin2	18.52	31.32	12.8	2.64	0.160428
cisplatin3	19.01	31.52	12.51	2.35	0.196146
cisplatin+vector1	18.56	31.07	12.51	2.35	0.196146
cisplatin+vector2	18.65	31.12	12.47	2.31	0.20166
cisplatin+vector3	18.91	32.03	13.12	2.96	0.128514
cisplatin+CTRP3	19.16	29.98	10.82	0.66	0.632878
cisplatin+CTRP3	18.59	29.89	11.3	1.14	0.45376
cisplatin+CTRP3	18.71	29.95	11.24	1.08	0.473029
control1	18.81	28.96	10.15	0.01	0.993092			10.1433
control2	18.37	28.48	10.11	-0.03	1.02101
control3	18.51	28.68	10.17	0.03	0.97942
cisplatin1	19.16	31.66	12.5	2.36	0.194791
cisplatin2	19.71	31.99	12.28	2.14	0.22688
cisplatin3	19.49	31.41	11.92	1.78	0.291183
cisplatin+si-NC1	19.26	31.66	12.4	2.26	0.208772
cisplatin+si-NC2	19.58	31.99	12.41	2.27	0.20733
cisplatin+si-NC3	19.39	31.41	12.02	1.88	0.271684
cisplatin+siCTRP3	18.75	32.06	13.31	3.17	0.111105
cisplatin+siCTRP3	18.42	32.25	13.83	3.69	0.0774817
cisplatin+siCTRP3	18.42	32.26	13.84	3.7	0.0769465
control1	18.64	31.38	12.74	0.123333	0.918064			12.6167
control2	18.45	31.05	12.6	-0.0166667	1.01162
control3	18.81	31.32	12.51	-0.106667	1.07674
cisplatin1	18.43	33.41	14.98	2.36333	0.194342
cisplatin2	18.78	33.68	14.9	2.28333	0.205423
cisplatin3	18.61	34.09	15.48	2.86333	0.13742
cisplatin+CTRP3	19.16	32.66	13.5	0.883333	0.542113
cisplatin+CTRP3	19.21	32.69	13.48	0.863333	0.549681
cisplatin+CTRP3	19.39	33.07	13.68	1.06333	0.478525
cisplatin+CTRP3+siNrf2	18.53	33.41	14.88	2.26333	0.20829
cisplatin+CTRP3+siNrf2	18.68	34.28	15.6	2.98333	0.126452
cisplatin+CTRP3+siNrf2	18.61	33.09	14.48	1.86333	0.274841
SOD2 mRNA level
SAMPLE	ACTIN	Ct	△Ct	△△Ct	2-△△Ct
control1	21.9	26.79	4.89	-0.09	1.06437		4.91333
control2	21.22	26.14	4.92	-0.06	1.04247
control3	21.82	26.75	4.93	-0.05	1.03526
cisplatin1	20.92	28.42	7.5	2.52	0.174343
cisplatin2	20.65	27.91	7.26	2.28	0.205898
cisplatin3	20.64	27.53	6.89	1.91	0.266093
cisplatin+vector1	21.23	28.53	7.3	2.32	0.200267
cisplatin+vector2	21.14	28.7	7.56	2.58	0.167241
cisplatin+vector3	21.17	28.78	7.61	2.63	0.161544
cisplatin+CTRP3	20.42	25.97	5.55	0.57	0.673617
cisplatin+CTRP3	20.55	26.81	6.26	1.28	0.411796
cisplatin+CTRP3	20.45	26.19	5.74	0.76	0.590496
control1	20.84	25.59	4.75	-0.05	1.03526		4.80333
control2	20.62	25.44	4.82	0.02	0.986233
control3	20.81	25.65	4.84	0.04	0.972655
cisplatin1	20.62	27.52	6.9	2.1	0.233258
cisplatin2	20.65	27.41	6.76	1.96	0.257028
cisplatin3	20.54	26.63	6.09	1.29	0.408951
cisplatin+si-NC1	21.03	27.95	6.92	2.12	0.230047
cisplatin+si-NC2	21.34	27.72	6.38	1.58	0.334482
cisplatin+si-NC3	21.27	27.68	6.41	1.61	0.327598
cisplatin+siCTRP3	20.52	28.77	8.25	3.45	0.0915054
cisplatin+siCTRP3	20.35	28.41	8.06	3.26	0.104386
cisplatin+siCTRP3	20.45	28.49	8.04	3.24	0.105843
control1	18.55	30.92	12.37	-0.143	1.1042		12.5133
control2	18.27	30.84	12.57	0.057	0.961261
control3	18.19	30.79	12.6	0.087	0.941478
cisplatin1	23.75	38.65	14.9	2.387	0.19118
cisplatin2	23.93	38.48	14.55	2.037	0.24367
cisplatin3	24.02	38.51	14.49	1.977	0.254018
cisplatin+CTRP3	22.55	35.75	13.2	0.687	0.621144
cisplatin+CTRP3	22.53	35.68	13.15	0.637	0.643049
cisplatin+CTRP3	22.62	36.11	13.49	0.977	0.508035
cisplatin+CTRP3+siNrf2	21.35	36.75	15.4	2.887	0.135184
cisplatin+CTRP3+siNrf2	21.53	36.78	15.25	2.737	0.149996
cisplatin+CTRP3+siNrf2	22.42	37.71	15.29	2.777	0.145895
BCL-2mRNA level
sample	actin	Ct	△Ct	△△Ct	2-△△Ct
control1	19.81	28.08	8.27	0.03	0.97942			8.24333
control2	19.75	27.94	8.19	-0.05	1.03526
control3	20.14	28.41	8.27	0.03	0.97942
cisplatin1	19.78	30.18	10.4	2.16	0.223756
cisplatin2	18.75	30.04	11.29	3.05	0.120742
cisplatin3	19.68	30.41	10.73	2.49	0.178006
cisplatin+vector1	19.25	30.28	11.03	2.79	0.144586
cisplatin+vector2	19.54	30.34	10.8	2.56	0.169576
cisplatin+vector3	19.48	30.45	10.97	2.73	0.150726
cisplatin+CTRP3	18.97	27.77	8.8	0.56	0.678302
cisplatin+CTRP3	19.14	28.51	9.37	1.13	0.456916
cisplatin+CTRP3	20.01	29.29	9.28	1.04	0.486327
control1	19.38	28.28	8.9	0.12	0.920188			8.77667
control2	19.65	28.44	8.79	0.01	0.993092
control3	20.04	28.68	8.64	-0.14	1.10191
cisplatin1	19.66	30.48	10.82	2.04	0.243164
cisplatin2	18.55	29.44	10.89	2.11	0.231647
cisplatin3	19.38	30.28	10.9	2.12	0.230047
cisplatin+si-NC1	19.35	30.38	11.03	2.25	0.210224
cisplatin+si-NC2	19.64	30.54	10.9	2.12	0.230047
cisplatin+si-NC3	19.58	30.48	10.9	2.12	0.230047
cisplatin+siCTRP3	18.77	30.78	12.01	3.23	0.106579
cisplatin+siCTRP3	19.24	31.04	11.8	3.02	0.123279
cisplatin+siCTRP3	20.12	31.78	11.66	2.88	0.135842
BAX mRNA level
sample	actin	Ct	△Ct	△△Ct	2-△△Ct
control1	17.73	31.66	13.93	-0.03	1.02101		13.96
control2	17.64	31.76	14.12	0.16	0.895025
control3	17.75	31.58	13.83	-0.13	1.09429
cisplatin1	17.71	29.66	11.95	-2.01	4.02782
cisplatin2	17.74	29.76	12.02	-1.94	3.83706
cisplatin3	17.85	29.58	11.73	-2.23	4.69134
cisplatin+vector1	17.78	29.86	12.08	-1.88	3.68075
cisplatin+vector2	17.73	29.66	11.93	-2.03	4.08405
cisplatin+vector3	17.69	29.45	11.76	-2.2	4.59479
cisplatin+CTRP3	17.74	30.86	13.12	-0.84	1.79005
cisplatin+CTRP3	17.91	30.66	12.75	-1.21	2.31338
cisplatin+CTRP3	17.67	30.45	12.78	-1.18	2.26577
control1	17.73	31.56	13.83	-0.14	1.10191		13.9667
control2	17.68	31.66	13.98	0.01	0.993092
control3	17.69	31.78	14.09	0.12	0.920188
cisplatin1	17.76	29.26	11.5	-2.47	5.54044
cisplatin2	17.39	29.35	11.96	-2.01	4.02782
cisplatin3	17.61	29.54	11.93	-2.04	4.11246
cisplatin+si-NC1	17.36	29.36	12	-1.97	3.91768
cisplatin+si-NC2	17.45	29.45	12	-1.97	3.91768
cisplatin+si-NC3	17.67	29.51	11.84	-2.13	4.37717
cisplatin+siCTRP3	17.66	28.36	10.7	-3.27	9.64646
cisplatin+siCTRP3	17.55	28.45	10.9	-3.07	8.39773
cisplatin+siCTRP3	17.37	28.51	11.14	-2.83	7.11074
