# Supplementary material for: CTRP3 attenuates inflammation, oxidative and cell death in cisplatin induced HK-2 cells
Source: PeerJ. 2023 Aug 23;11:e15890. doi: 10.7717/peerj.15890 (PMC10460153; doi:10.7717/peerj.15890)
Supplement: Supplemental Information 4 — Used in preparation for Fig. 1, Fig. 2A, B, F, G, Fig. 3A, B, F, G, Fig. 4A, F, H, Fig. 5A, F, H,, Fig. 6B, C, D, Fig. 7B, F, G, Fig. 8B, C, D, E, and Fig. 9A, B. [file peerj-11-15890-s004.xlsx]

## Sheet: Sheet1
MTT was used to determine the optimum concentration of cisplatin
cisplatin(ug/ml)	Absorbance value 24h			Mean absorbance	Inhibition rate					cell viability(% of control)
0	0.358	0.367	0.358	0.361	0	0	0			1	1	1
1	0.319	0.315	0.318	0.317	0.1163	0.1274	0.1191			0.8837	0.8726	0.8809
2	0.292	0.281	0.288	0.287	0.1911	0.2216	0.2022			0.8089	0.7784	0.7978
4	0.219	0.223	0.216	0.219	0.3934	0.3823	0.4017			0.6066	0.6177	0.5983
8	0.142	0.144	0.147	0.144	0.6066	0.6011	0.5928			0.3934	0.3989	0.4072
16	0.134	0.131	0.145	0.137	0.6288	0.6371	0.5983			0.3712	0.3629	0.4017
32	0.116	0.116	0.114	0.115	0.6787	0.6787	0.6842			0.3213	0.3213	0.3158
CTRP3 protein of HK-2 cells after cisplatin treated
specimen	Stripe gray value
	GAPDH	CTRP3	CTRP3/GAPDH
Control1	2511.12	1348.12	0.536861
Control2	2615.24	1457.24	0.557213
Control3	2541.35	1421.32	0.559277
cisplatin1	2576.24	821.245	0.318777
cisplatin2	2768.32	754.325	0.272485
cisplatin3	2741.22	878.254	0.320389
CTRP3 mRNA of HK-2 cells after cisplatin treated
group	internal	Target gene Ct	△Ct	△△Ct	2-△△Ct
control	17.59	27.96	10.37	0.08	0.946058
	17.69	27.81	10.12	-0.17	1.12506
	17.4	27.78	10.38	0.09	0.939523
cisplatin	18.64	32.18	13.54	3.25	0.105112
	18.45	31.4	12.95	2.66	0.15822
	18.81	31.32	12.51	2.22	0.214641
CTRP3 protein of HK-2 cells after overexpression CTRP3
GROUP	GAPDH	CTRP3	CTRP3/GAPDH
Control	2484.23	1201.24	0.483549
cisplatin+vector	2401.27	315.146	0.131241
cisplatin+ctrp3	2414.14	1324.13	0.54849
Control	2474.22	1198.32	0.484324
cispltian+vector	2411.32	320.147	0.132769
cisplatin+ctrp3	2400.14	1300.12	0.541686
Control	2483.23	1211.54	0.487889
cispltian+vector	2398.55	310.265	0.129355
cisplatin+ctrp3	2514.32	1400.21	0.556895
CTRP3 mRNA of HK-2 cells after overexpression CTRP3
group	internal	Target geneCt	△Ct	△△Ct	2-△△Ct	mean
control	17.91	28.88	10.97	-0.003	1.00208	1.00025
	17.75	28.78	11.03	0.057	0.961261
	18.01	28.93	10.92	-0.053	1.03742
cisplatin+vector	18.32	31.77	13.45	2.477	0.179618	0.214165
	18.45	31.58	13.13	2.157	0.224222
	18.73	31.77	13.04	2.067	0.238655
cisplatin+ctrp3	18.71	29.88	11.17	0.197	0.872363	0.869515
	18.93	30.78	11.85	0.877	0.544499
	19.11	29.83	10.72	-0.253	1.19168
CTRP3 protein of HK-2 cells after knockdown CTRP3
	Stripe gray value
group	GAPDH	CTRP3	CTRP3/GAPDH
Control	3463.6	1896.92	0.547672
cisplatin+scramble	3608.21	639.458	0.177223
cisplatin+siCTRP3	3244.46	102.25	0.0315153
Control	3363.52	1900.25	0.56496
cisplatin+scramble	3600.24	524.215	0.145606
cisplatin+siCTRP3	3241.22	120.451	0.0371623
Control	3412.54	1847.21	0.541302
cisplatin+scramble	3714.22	504.215	0.135753
cisplatin+siCTRP3	3024.21	129.854	0.0429381
CTRP3 mRNA of HK-2 cells after knockdown CTRP3
group	internal	Target geneCt	△Ct	△△Ct	2-△△Ct	mean
control	17.59	27.96	10.37	0.08	0.946058	1.00355
	17.69	27.81	10.12	-0.17	1.12506
	17.4	27.78	10.38	0.09	0.939523
cisplatin+scramble	18.98	30.35	11.37	1.08	0.473029	0.346386
	19.47	31.87	12.4	2.11	0.231647
	19.76	31.63	11.87	1.58	0.334482
cisplatin+siCTRP3	18.67	34.74	16.07	5.78	0.018199	0.0191401
	18.75	34.87	16.12	5.83	0.017579
	18.91	34.73	15.82	5.53	0.0216423
Cell viability of HK-2 cells after overexpression CTRP3 and knockdown CTRP3
group	Absorbance value 24h			Mean absorbance	Inhibition rate			cell viability(% of control)
control1	0.572	0.545	0.546	0.554	0	0	0	1	2	3
cisplatin1	0.238	0.238	0.232	0.236	0.5707	0.5707	0.5815	0.429603	0.429603	0.418773
cisplatin1+vector	0.238	0.239	0.24	0.239	0.5707	0.5689	0.567	0.429603	0.431408	0.433213
cisplatin+CTRP3	0.353	0.358	0.362	0.358	0.3632	0.3542	0.347	0.637184	0.646209	0.65343
control2	0.552	0.561	0.541	0.551	0	0	0	0.99639	1.01264	0.976534
cisplatin2	0.268	0.264	0.258	0.263	0.5111	0.5183	0.5292	0.483755	0.476534	0.465704
cisplatin+siRNA	0.256	0.259	0.262	0.259	0.5328	0.5274	0.5219	0.462094	0.467509	0.472924
cisplatin+siCTRP3	0.088	0.082	0.083	0.084	0.8413	0.8521	0.8503	0.158845	0.148014	0.149819
SOD activity of HK-2 cells after overexpression CTRP3 and knockdown CTRP3
group	Determination of OD value			Determination of blank hole			Compare the OD value of the well			The OD value of blank Wells was compared			Ratio of dilution		SOD inhibition rate	SOD activity		SOD inhibition rate	SOD activity		SOD inhibition rate	SOD activity
	1	2	3	1	2	3	1	2	3	1	2	3	100	1		1	2	2	2	3
Acontrol	0.289	0.291	0.283	0.092	0.089	0.091	0.328	0.321	0.324	0.083	0.083	0.082	100	0.048	0.195918	104.49	0.036	0.151261	79.6108	0.05	0.206612	105.955
Bcisplatin	0.315	0.304	0.307	0.092	0.089	0.091	0.328	0.321	0.334	0.083	0.083	0.082	100	0.022	0.0897959	50.1653	0.023	0.0966387	53.9881	0.036	0.142857	77.6398
Ccisplatin+vector	0.318	0.305	0.31	0.092	0.089	0.091	0.328	0.321	0.334	0.083	0.083	0.082		0.019	0.077551	47.7237	0.022	0.092437	54.6964	0.033	0.130952	78.887
Dcisplatin+CTRP3	0.285	0.291	0.287	0.092	0.089	0.091	0.328	0.321	0.334	0.083	0.083	0.082	100	0.052	0.212245	130.612	0.036	0.151261	89.5033	0.056	0.222222	133.869
Econtrol	0.288	0.279	0.284	0.092	0.089	0.091	0.328	0.321	0.334	0.083	0.083	0.082	100	0.049	0.2	100.756	0.048	0.201681	103.959	0.059	0.234127	120.996
Fcisplatin	0.314	0.309	0.31	0.092	0.089	0.091	0.328	0.321	0.334	0.083	0.083	0.082	100	0.023	0.0938776	44.1777	0.018	0.0756303	36.4483	0.033	0.130952	64.1923
Gcisplatin+siRNA	0.312	0.306	0.31	0.092	0.089	0.091	0.328	0.321	0.334	0.083	0.083	0.082		0.025	0.102041	49.1763	0.021	0.0882353	41.7188	0.033	0.130952	63.7238
Hcispaltin+siCTRP3	0.328	0.32	0.321	0.092	0.089	0.091	0.328	0.321	0.324	0.083	0.083	0.082	100	0.009	0.0367347	17.7892	0.007	0.0294118	14.6327	0.012	0.0495868	24.8555
Acontrol	0.375	0.38	0.39
Bcisplatin	0.358	0.358	0.368
Ccisplatin+vector	0.36	0.361	0.364
Dcisplatin+CTRP3	0.325	0.338	0.332
Econtrol	0.397	0.388	0.387
Fcisplatin	0.425	0.415	0.408
Gcisplatin+siRNA	0.415	0.423	0.411
Hcispaltin+siCTRP3	0.413	0.402	0.399
MDA level of HK-2 cells after overexpression CTRP3 and knockdown CTRP3
	Standard tube	Blank tube	control tube	measure tube	concentration（nmol/ml)
control	0.071	0.004	0.004	0.012	1.19403
	0.071	0.005	0.004	0.013	1.36364
	0.069	0.007	0.003	0.011	1.29032
cisplatin	0.071	0.004	0.004	0.027	3.43284
	0.071	0.005	0.004	0.033	4.39394
	0.069	0.007	0.004	0.029	4.03226
cisplatin+vector	0.071	0.005	0.004	0.027	3.48485
	0.072	0.004	0.004	0.033	4.26471
	0.069	0.006	0.004	0.029	3.96825
cisplatin+ctrp3	0.071	0.004	0.004	0.013	1.34328
	0.071	0.005	0.003	0.013	1.51515
	0.069	0.007	0.003	0.014	1.77419
control	0.071	0.004	0.004	0.011	1.04478
	0.071	0.005	0.003	0.011	1.21212
	0.069	0.007	0.005	0.012	1.12903
cisplatin	0.071	0.004	0.004	0.03	3.8806
	0.071	0.005	0.003	0.028	3.78788
	0.069	0.007	0.005	0.031	4.19355
cisplatin+siRNA	0.071	0.005	0.004	0.03	3.8806
	0.072	0.005	0.003	0.028	3.62319
	0.068	0.006	0.005	0.031	4.12698
cisplatin+si-ctrp3	0.071	0.004	0.004	0.051	7.01493
	0.071	0.005	0.003	0.047	6.66667
	0.069	0.007	0.005	0.047	6.77419
MCP-1 level of HK-2 cells after overexpression CTRP3 and knockdown CTRP3
Sample	Absorbance value		Mean absorbance	Corrected absorbance		Correction of the mean absorbance	MCP-1 concentration（pg/ml）		mean of MCP-1concentration（pg/ml）
standard1	0.035	0.031	0.033	0.002	-0.002	0	0
standard2	0.125	0.124	0.1245	0.092	0.091	0.0915	15.6
standard3	0.194	0.198	0.196	0.161	0.165	0.163	31.25
standard4	0.271	0.265	0.268	0.238	0.232	0.235	62.5
standard5	0.398	0.401	0.3995	0.365	0.368	0.58	125
standard6	0.619	0.607	0.613	0.586	0.574	1.1165	250
standard7	1.144	1.155	1.1495	1.111	1.122	1.944	500
standard8	1.973	1.981	1.977	1.94	1.948	0.058	1000
control-1	0.097	0.085	0.091	0.064	0.052		13.3585	10.5171	11.9378
cisplatin-1	0.589	0.624	0.6065	0.556	0.591		122.934	130.497	126.716
cisplatin+ctrp3 vector	0.612	0.578	0.595	0.579	0.545		127.904	120.557	124.23
cispaltin+ctrp3	0.121	0.149	0.135	0.088	0.116		19.0055	25.5363	22.2709
control-2	0.093	0.088	0.0905	0.06	0.055		12.4127	11.2286	11.8206
cisplatin-2	0.652	0.613	0.6325	0.619	0.58		136.554	128.12	132.337
cisplatin+siRNA	0.642	0.637	0.6395	0.609	0.604		134.39	133.309	133.85
cispaltin+si-ctrp3	0.842	0.786	0.814	0.809	0.753		178.091	165.735	171.913
TNF-α level of HK-2 cells after overexpression CTRP3 and knockdown CTRP3
Sample	Absorbance value		Mean absorbance	Corrected absorbance		Correction of the mean absorbance	TNF-α concentration（pg/ml）		mean of TNF-α concentration（pg/ml）
standard1	0.065	0.061	0.063	0.002	-0.002	0	0
standard2	0.115	0.114	0.1145	0.052	0.051	0.0515	15.63
standard3	0.134	0.138	0.136	0.071	0.075	0.073	31.25
standard4	0.307	0.191	0.249	0.244	0.128	0.186	62.5
standard5	0.359	0.327	0.343	0.296	0.264	0.28	125
standard6	0.671	0.655	0.663	0.608	0.592	0.6	250
standard7	1.573	1.481	1.527	1.51	1.418	1.464	500
standard8	2.911	2.782	2.8465	2.848	2.719	2.7835	1000
control-1	0.128	0.141	0.1345	0.065	0.078		24.2537	30.5141	27.3839
cisplatin-1	0.385	0.324	0.3545	0.322	0.261		138.63	113.179	125.905
cisplatin+ctrp3 vector	0.354	0.371	0.3625	0.291	0.308		125.819	132.875	129.347
cispaltin+ctrp3	0.204	0.253	0.2285	0.141	0.19		60.0997	82.276	71.1878
control-2	0.133	0.091	0.112	0.07	0.028		26.6679	6.1354	16.4017
cisplatin-2	0.412	0.434	0.423	0.349	0.371		149.586	158.378	153.982
cisplatin+siRNA	0.42	0.415	0.4175	0.357	0.352		152.797	150.792	151.795
cispaltin+si-ctrp3	0.564	0.592	0.578	0.501	0.529		208.008	218.21	213.109
Flow cytometry apoptosis of HK-2 cells after overexpression CTRP3 and knockdown CTRP3
	sample1	sample2	sample3
control	4.55	4.63	4.82
cisplatin	9.54	9.96	9.66
cisplatin+vector	9.93	9.72	9.49
cisplatin+CTRP3	4.67	4.87	4.63
control	5.09	4.75	5.16
cisplatin	9.86	9.99	10.17
cisplatin+siRNA	9.84	10.16	10.01
cisplatin+siCTRP3	20.84	20.36	21.12
Cells proliferation was determined by EdU assay
	sample1	sample2	sample3	sample4	proliferation 1	proliferation 2	proliferation 3	proliferation 4
control1	85	115	165	104	0.150442	0.186688	0.293594	0.173333
control1	565	616	562	600
cisplatin1	71	75	90	109	0.118333	0.13181	0.135952	0.14361
cisplatin1	600	569	662	759
cisplatin+CTRP3	159	114	106	122	0.268581	0.206522	0.166929	0.217857
cisplatin+CTRP3	592	552	635	560
cisplatin+vector	52	80	85	75	0.0895009	0.139616	0.133858	0.137112
cisplatin+vector	581	573	635	547
control2	157	152	145	118	0.217151	0.287335	0.268519	0.223909
control2	723	529	540	527
cisplatin2	90	90	96	99	0.166052	0.163043	0.158416	0.158654
cisplatin2	542	552	606	624
cisplatin+siCTRP3	73	52	45	45	0.131769	0.0852459	0.0728155	0.0769231
cisplatin+siCTRP3	554	610	618	585
cisplatin+siRNA	85	85	90	89	0.158879	0.154545	0.151261	0.148333
cisplatin+siRNA	535	550	595	600
The quantitative analysis the protein levels of p-ERK、p-p38、p-JNK after CTRP3 overexpression
	Stripe gray value
	group	β-actin	p-ERK	ERK	p-JNK	JNK	p38	p-p38			p-ERK/β-actin	p-JNK/β-actin	p-p38/β-actin
repeat1	control	2808.03	156.735	554.357	269.459	1610.93	2607.02	262.605			0.282734	0.167269	0.10073
	cisplatin	2824.5	752.356	773.341	1506.5	1548.22	2547.87	932.914			0.972864	0.973048	0.366155
	cisplatin+ctrp3	2631.19	137.104	753.766	424.198	1531.28	2419.72	279.325			0.181892	0.277021	0.115437
repeat2	control	2744.39	179.098	647.529	655.703	1610.06	2421.15	279.021			0.276588	0.407255	0.115243
	cisplatin	2648.45	619.793	555.387	1409.74	1490.02	2374.19	861.677			1.11597	0.946122	0.362935
	cisplatin+ctrp3	2585.57	131.81	599.726	476.085	1755.06	2381.1	225.731			0.219784	0.271264	0.0948014
repeat3	control	2601.85	118.61	716.735	354.877	1647.04	2446.44	204.327			0.165486	0.215463	0.08352
	cisplatin	2541.46	533.296	670.751	1531.77	1494.05	2329.88	747.246			0.795073	1.02525	0.320723
	cisplatin+ctrp3	2554.57	144.835	716.269	449.357	1625.02	2389.13	147.279			0.202208	0.276523	0.0616457
The levels of Cleaved caspase 3 was detected using Western blot analysis after MAPK inhibitors administration
	group	β-actin	Cleaved caspase3					Cleaved caspase3/β-actin
repeat1	control	3541.15	129.276					0.0365067
	cisplatin	3466.44	1060.06					0.305808
	cisplatin+si-ctrp3	3413.34	1880.13					0.550817
	cisplatin+si-ctrp3+U0126	3319.41	551.68					0.166198
	cisplatin+si-ctrp3+SB203580	2990.11	463.347					0.15496
	cisplatin+si-ctrp3+SP600125	3142.18	338.928					0.107864
		β-actin	Cleaved caspase3					Cleaved caspase3/β-actin
repeat2	control	2342.5	104.718					0.0447033
	cisplatin	2280.69	1033.84					0.453303
	cisplatin+si-ctrp3	2118.54	2118.54					1
	cisplatin+si-ctrp3+U0126	2231.74	620.413					0.277996
	cisplatin+si-ctrp3+SB203580	2414.57	526.183					0.217919
	cisplatin+si-ctrp3+SP600125	2395.94	570.528					0.238122
		β-actin	Cleaved caspase3					Cleaved caspase3/β-actin
repeat3	control	2630.39	87.1958					0.0331494
	cisplatin	2641.66	1185.97					0.448949
	cisplatin+si-ctrp3	2468.4	2304					0.9334
	cisplatin+si-ctrp3+U0126	2583.47	1097.81					0.424934
	cisplatin+si-ctrp3+SB203580	2305.21	887.988					0.38521
	cisplatin+si-ctrp3+SP600125	2595.39	811.584					0.312702
Level of MCP-1 after MAPK inhibitors administration
sample	Absorbance value		Mean absorbance	Corrected absorbance		Correction of the mean absorbance	MCP-1 concentration（pg/ml）		mean of MCP-1concentration（pg/ml）
standard1	0.029	0.027	0.028	0.001	-0.001	0	0
standard2	0.131	0.127	0.129	0.103	0.099	0.101	15.6
standard3	0.204	0.191	0.1975	0.176	0.163	0.1695	31.25
standard4	0.255	0.274	0.2645	0.227	0.246	0.2365	62.5
standard5	0.381	0.405	0.393	0.353	0.377	0.584	125
standard6	0.609	0.615	0.612	0.581	0.587	1.133	250
standard7	1.164	1.158	1.161	1.136	1.13	1.993	500
standard8	2.031	2.011	2.021	2.003	1.983	0.056	1000
control	0.073	0.095	0.084	0.045	0.067		8.02433	13.2045	10.6144
cisplatin	0.425	0.384	0.4045	0.397	0.356		87.2728	78.3485	82.8106
cisplatin+si-ctrp3	0.664	0.693	0.6785	0.636	0.665		138.681	144.907	141.794
cisplatin+si-ctrp3+U0126	0.436	0.411	0.4235	0.408	0.383		89.6586	84.2313	86.945
cisplatin+si-ctrp3+SB203580	0.425	0.432	0.4285	0.397	0.404		87.2728	88.7914	88.0321
cisplatin+si-ctrp3+SP600125	0.413	0.474	0.4435	0.385	0.446		84.6662	97.8768	91.2715
Level of TNF-α after MAPK inhibitors administration
sample	Absorbance value		Mean absorbance	Corrected absorbance		Correction of the mean absorbance	TNF-αconcentration（pg/ml）		mean of TNF-α concentration（pg/ml）
standard1	0.081	0.068	0.0745	0.0065	-0.0065	-6.93889e-18	0
standard2	0.098	0.103	0.1005	0.0235	0.0285	0.026	15.63
standard3	0.135	0.151	0.143	0.0605	0.0765	0.0685	31.25
standard4	0.21	0.207	0.2085	0.1355	0.1325	0.134	62.5
standard5	0.371	0.356	0.3635	0.2965	0.2815	0.289	125
standard6	0.647	0.644	0.6455	0.5725	0.5695	0.571	250
standard7	1.408	1.361	1.3845	1.3335	1.2865	1.31	500
standard8	2.911	2.816	2.8635	2.8365	2.7415	2.789	1000
control	0.107	0.148	0.1275	0.0325	0.0735		15.4446	34.7679	25.1062
cisplatin	0.412	0.368	0.39	0.3375	0.2935		151.559	132.957	142.258
cisplatin+si-ctrp3	0.558	0.591	0.5745	0.4835	0.5165		211.055	224.057	217.556
cisplatin+si-ctrp3+U0126	0.385	0.362	0.3735	0.3105	0.2875		140.183	130.395	135.289
cisplatin+si-ctrp3+SB203580	0.374	0.365	0.3695	0.2995	0.2905		135.513	131.677	133.595
cisplatin+si-ctrp3+SP600125	0.352	0.392	0.372	0.2775	0.3175		126.111	143.144	134.628
Apoptosis was analyzed by TUNEL assay after MAPK inhibitors administration
	sample1			sample2			sample3
	TUNEL	DAPI	Apoptosis ratio	TUNEL	DAPI	Apoptosis ratio	TUNEL	DAPI	Apoptosis ratio
control	15	575	0.026087	11	411	0.026764	10	570	0.0175439
cisplatin	95	672	0.141369	100	680	0.147059	89	665	0.133835
cisplatin+si-ctrp3	319	519	0.614644	310	510	0.607843	325	532	0.610902
cisplatin+si-ctrp3+U0126	75	502	0.149402	71	408	0.17402	80	495	0.161616
cisplatin+si-ctrp3+SB203580	120	643	0.186625	115	640	0.179688	87	572	0.152098
cisplatin+si-ctrp3+SP600125	88	555	0.158559	90	560	0.160714	85	545	0.155963
The protein expression levels of Nrf2, p-p38, p-JNK and p-ERK were examined by Western blotting analysis
	GROUP	β-actin	p-ERK	ERK	p-JNK	JNK	p38	p-p38	Nrf2		p-ERK/β-actin	p-JNK/β-actin	p-p38/β-actin	Nrf2/β-actin
repeat1	control	2182.83	167.565	822.387	407.918	666.568	1752.35	152.381	125.699		0.203754	0.611968	0.0869581	0.0575853
	cisplatin	2309.63	834.641	831.02	1120.55	677.632	1869.45	1047.05	41.034		1.00436	1.65363	0.560088	0.0177665
	cisplatin+ctrp3+NC	2259.32	209.826	734.814	370.748	744.105	1705.72	134.578	129.979		0.28555	0.498248	0.0788977	0.0575303
	cisplatin+ctrp3+siNrf2	2226.09	870.667	699.052	1290.86	893.514	1792.31	980.783	32.0828		1.2455	1.4447	0.547216	0.0144122
		β-actin	p-ERK	ERK	p-JNK	JNK	p38	p-p38	Nrf2		p-ERK(双带)	p-JNK(双带)	p-p38	Nrf2
repeat2	control	1959.79	175.491	602.854	272.027	751.67	1819.41	171.399	122.101		0.291101	0.361897	0.094206	0.062303
	cisplatin	2190.16	858.384	589.75	1294.61	784.046	1776.04	833.491	49.4836		1.4555	1.65119	0.469298	0.0225936
	cisplatin+ctrp3+siNC	2215.8	306.199	643.523	340.659	870.238	1752.11	178.394	149.43		0.475817	0.391455	0.101817	0.0674384
	cisplatin+ctrp3+siNrf2	2016.38	878.777	646.626	1395.3	749.624	1696	777.048	37.7174		1.35902	1.86133	0.458165	0.0187055
		β-actin	p-ERK	ERK	p-JNK	JNK	p38	p-p38	Nrf2		p-ERK(双带)	p-JNK(双带)	p-p38	Nrf2
repeat3	control	1674.3	422.152	1545.73	234.679	1215.45	2534.81	213.639	179.816		0.273108	0.193079	0.0842821	0.107397
	cisplatin	1704.52	1308.92	1349.79	1373.33	1133.45	2409.87	2120.52	60.4433		0.969724	1.21164	0.879931	0.0354606
	cisplatin+ctrp3+siNC	1887.63	393.388	1713.26	262.772	1497.84	2647.91	570.109	220.636		0.229613	0.175434	0.215305	0.116885
	cisplatin+ctrp3+siNrf2	1829.31	1156.43	1575.19	1255.32	1370.33	2627.47	1941.02	75.9092		0.734149	0.916069	0.73874	0.0414962
The levels of MDA in cisplatin treated HK-2 cells after Nrf2 silencing
	Standard tube	Blank tube	control tube	measure tube	concentration（nmol/ml)
control	0.07	0.004	0.004	0.014	1.51515
	0.071	0.005	0.004	0.012	1.21212
	0.068	0.005	0.005	0.011	0.952381
cisplatin	0.07	0.004	0.004	0.032	4.24242
	0.071	0.005	0.005	0.034	4.39394
	0.068	0.005	0.004	0.034	4.7619
cisplatin+ctrp3+siNC	0.07	0.004	0.004	0.013	1.36364
	0.071	0.005	0.004	0.013	1.36364
	0.068	0.005	0.004	0.014	1.5873
cisplatin+ctrp3+NC+siNrf2	0.07	0.004	0.004	0.035	4.69697
	0.071	0.005	0.003	0.031	4.24242
	0.068	0.005	0.005	0.034	4.60317
